# Supplementary material
Source: Springer Nature journal article supplement (https://www.springermedizin.de/resource/supplementary/12889_2005_475_MOESM3_ESM.pdf/9500952)

### Locations without nursing home

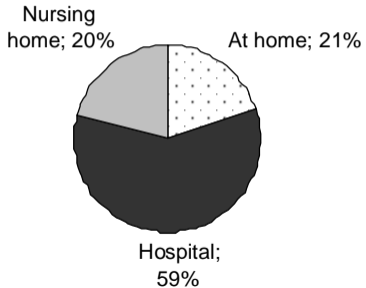

### Locations with nursing home

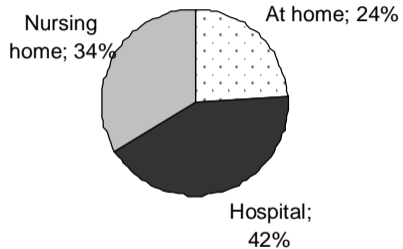

Supplement: MOESM3 [file 9500952]
